# Supplementary material
Source: HighWire-hosted journal article supplement (https://ebmtp.com/highwire/filestream/136833/field_highwire_adjunct_files/0/hamedani_1308.pdf)
Supplement: hamedani_1308.pdf [file hamedani_1308.pdf]

# 偏头痛与白质高信号

## ARIC 磁共振研究

Ali G. Hamedani, MD,  
MHS  
Kathryn M. Rose, PhD  
B. Lee Peterlin, DO  
Thomas H. Mosley, PhD  
Laura H. Coker, PhD  
Clifford R. Jack, MD  
David S. Knopman, MD  
Alvaro Alonso, MD,  
MPH, PhD  
Rebecca F. Gottesman,  
MD, PhD

Correspondence to  
Dr. Gottesman:  
rgottesm@jhmi.edu

### 摘要

**目的：**横断面研究表明偏头痛与白质高信号（white matter hyperintensities,WMH）相关，但其是否影响 WMH 的进展还不确定。

**方法：**1993 年~1995 年，社区队列人群的动脉粥样硬化风险研究中（n = 10,924）的参与者完成了标准化头痛问卷。部分参与者间隔 8~12 年完成两次磁共振检查：一次在头痛发生时，另一次在 2004 年~2006 年间。WMH 采用视觉分级评分（0~9）和半自动体积分析方法评估后进行四分。通过校正年龄、性别和其他血管危险因素，采用线性分析和 Logistic 回归分析模型对偏头痛与 WMH 的关系进行分析。

**结果：**横断面分析表明，无先兆偏头痛患者 WMH 评分 $\geq 3$  分的风险比先兆偏头痛高 87% [校正后的 OR 值为 1.87; 95% 可信区间（confidence interval,CI）：1.04~3.37]。无先兆偏头痛者与无偏头痛者相比，前者 WMH 得分 $\geq 3$  的风险比后者高出 87%（调整后的 OR 值为 1.87; 95%CI：1.04~3.37）。偏头痛患者 WMH 体积较无偏头痛患者平均高 2.65 cm<sup>3</sup>（95%CI：0.06~5.24）。然而研究期间，偏头痛患者与无偏头痛患者之间在 WMH 进展方面无统计学差异（偏头痛患者较无偏头痛患者高 1.58 cm<sup>3</sup>；95%CI：-0.37~3.53）

**结论：**横断面分析表明偏头痛与 WMH 体积相关，但随着时间的变化偏头痛与 WMH 的进展无关。这表明，偏头痛和 WMH 之间的关系在年老时比较稳定，且可能主要归因于年轻时发生的变化，但还需要进一步的研究来证实。

### 术语

ARIC = 社区动脉粥样硬化风险；CHS = 心血管健康研究；CI = 可信区间；OR = 比值比；WMH = 白质高信号。

一些流行病学研究，包括近期的两个基于人群的研究<sup>[1,2]</sup>，已经证实偏头痛和白质高信号（white matter hyperintensities,WMH）横断面相关联，WMH 被认为是慢性脑小血管病的一个常见 MRI 影像标记物<sup>[3]</sup>。然而，这些研究关于性别的和先兆的出现对偏头痛与 WMH 关系的影响结论不同。其中一项研究的随访发现，偏头痛与 WMH 的明显进展有关，但仅在女性幕上深部的 WMH 有统计学意义<sup>[4]</sup>。

为了进一步研究偏头痛和白质病变之间的关系，我们分析了来自社区动脉粥样硬化风险（Atherosclerosis Risk in Communities,ARIC）研究人群的 MRI 数据。我们假设偏头痛病史不仅与基线 WMH 体积相关，且与 WMH 随着时间推移而进展有关。

**方法 研究设计与人群。**ARIC 研究是一项正在进行的前瞻性队列研究，旨在不同种族及社会经济状况下探究动脉粥样硬化的病因及心血管疾病和危险因素的变化<sup>[5]</sup>。参与人员来自 4 个地区，分别是北卡罗莱纳州，杰克逊市，

补充数据见  
[www.neurology.org](http://www.neurology.org)

From the Department of Neurology (A.G.H., B.L.P., R.F.G.), Johns Hopkins School of Medicine, Baltimore; Department of Epidemiology (A.G.H., R.F.G.), Johns Hopkins Bloomberg School of Public Health, Baltimore, MD; Department of Epidemiology (K.M.R.), Gillings School of Global Public Health, University of North Carolina at Chapel Hill; Department of Medicine-Geriatrics (T.H.M.), University of Mississippi Medical Center, Jackson, MS; Department of Social Sciences and Health Policy (L.H.C.), Division of Public Health Services, Wake Forest School of Medicine, Winston-Salem, NC; Departments of Radiology (C.R.J.) and Neurology (D.S.K.), Mayo Clinic, Rochester, MN; and Division of Epidemiology and Community Health (A.A.), School of Public Health, University of Minnesota, St. Paul.

Go to [Neurology.org](http://Neurology.org) for full disclosures. Funding information and disclosures deemed relevant by the authors, if any, are provided at the end of the article.

明尼阿波利斯的西北部和华盛顿。1987年~1989年，共15,792人首次就诊时进行登记。在研究开始的前两年（1993~1995）的第三次随访中，对北卡罗莱纳州和杰克逊市年龄≥55岁的患者进行了脑MRI检查<sup>[6]</sup>。起初对2,891例参与者进行脑MRI检查，但2%的女性和6%的男性由于安全原因未进行此项检查。而在这些符合标准的人群中，25%的女性和21%的男性共计1,949人在第三次MRI随访时因拒绝参与而未进行检查。这些人员将受邀参加一项只需要二次随访MRI资料的辅助性研究，这项研究在2004~2006年之间完成。不同的MRI检查时间间隔在8~15年不等（图1）。

**头痛状态的确诊。**所有参与人员在第三次随访时自行填写一份头痛问卷。对报告有终生严重头痛病史的患者进行头痛分类：先兆偏头痛、无先兆偏头痛、非偏头痛性头痛。如果患者的头痛表现满足以下特点即可认定为偏头痛：1）至少持续4个小时；2）特点：单侧，重击样或搏动性头痛或跳痛；3）伴随恶心，呕吐，或畏光和畏声；4）这种头痛发作1年或者1年以上。如果头痛至少持续4个小时，但不符合其他的标准，可诊断为非偏头痛性头痛。如果患者头痛持续时间少于4小时，可认为“不严重的头痛”，本研究中认为没有头痛。头痛问卷中也包含单独涉及视觉先兆（例如单眼或双眼的闪光点，齿状线或热波线）的问题。

**白质高信号的测量。**第三次随访时完成1.5T磁共振扫描，获取层厚5mm的连续性轴向扫描序列并在ARIC磁共振读片中心进行解读<sup>[7]</sup>。白质高信号的严重程度评估采用心血管健康研究（Cardiovascular Health Study, CHS）中使用的视觉评估量表，等级分为0~9分<sup>[8]</sup>。深部和侧脑室旁白质异常的总体积通过分析8幅参考图像，从轻微病变（1级）到弥散和融合病变（8级）连续递增。检测不到的白质改变的定为0级，比8级更严重的定为9级。图像分析在不了解患者年龄、性别、种族、既往影像学

资料和血管危险因素的情况下进行。对于WMH同一等级，读片者之间有92%的一致性，同一阅片者有94.5%的一致性。一致性检验粗测Kappas值分别为0.81和0.93。

2004~2006年，对1,028例个体进行1.5T脑MRI检查，结果也在ARIC MRI阅读中心分析。这些图像采用CHS分级系统（也应用于第三次随访时第一次MRI图像分析）和新的半自动化体积分析<sup>[9]</sup>。轴向反转恢复图像可得到脑和白质疏松的体积。依据图像中不同元素信号强度的不同，可计算并区分出正常大脑、脑脊液或脑白质疏松。白质疏松图谱采用手绘绘制以排除梗塞和其他病变。采用这种方法测量白质疏松的体积平均绝对误差和重复测量的变异系数分别是6.6%和1.4%。大脑的总体积可在矢状位T1加权像上手动测量，以1,500 cm<sup>3</sup>标准化大脑体积测量脑白质高信号的体积。

在第三次随访时，由于不能对WMH测量值完全定量，所以WMH体积使用分类评分通过之前ARIC研究使用的估算方程式（ $R^2 = 0.8$ ）进行估算<sup>[10]</sup>。在随访脑MRI时这个方程是通过WMH分类评分（CHS评分量表）的二次关系衍生而来，同时使用视觉评分的相同序列进行脑WMH的体积测量。WMH体积的变化通过随访MRI时测量的体积减去第三次随访第一次MRI检查WMH估算（采用上述方程式）的体积计算而来。对于个体如果WMH体积减少超过20 cm<sup>3</sup>将被标记为数据丢失，因为出现这种情况很可能是由于测量错误引起。

**统计分析。**所有数据使用STATS 12软件进行分析。因为非白人和非黑人的数据太少（ $n = 38$ ），不能有效的参与评估，所以在初步分析中相关数据被去除，但补充表格中包含相关数据。采用回归分析方法，校正年龄、种族、性别、糖尿病、总胆固醇、血压、使用降压药、吸烟、冠心病史、BMI、饮酒和家庭收入等因素后，分析偏头痛与白质高信号分级的相关性。分类量表（0~9分）评分≥3分定义为有明显的白质病变。校正变量后，使用线性分析，分析白质高信号在MRI中的体积和随着时间推移白质疾病的进展情况，且分析白质疾病进展时需要另外校正两次MRI检查的间期。通过偏头痛和性别交互分析用于检测性别的修饰影响。各种头痛分类，包括全部头痛、偏头痛、有先兆偏头痛、无先兆偏头痛、先兆不伴偏头痛、无先兆无偏头痛，每种头痛通过单独的模型与无头痛患者进行对比分析。从白质高信号体积的分布来看，似乎有右侧优势，但通过尝试却没有成功转换为正态分布变量，但是不影响整体的最终结果。对因严重WMH而排除在外的患者进行敏感性分析，也没有影响

图1 社区人群动脉粥样硬化危险因素队列研究中的受试者磁共振研究时间表

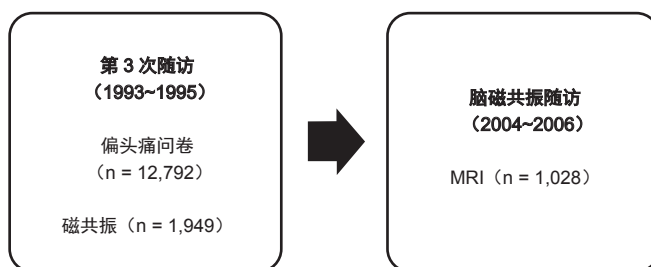

所有行脑磁共振检查的受试者均完成了头痛问卷。

**表 1** 对其头痛状况进行了三年随访（1993 - 1995）的 ARIC 研究人群的临床和人口学资料表

|                                     | 先兆性偏头痛<br>(n = 422) | 无先兆偏头痛<br>(n = 1,003) | 非偏头痛性头痛<br>(n = 1,280) | 非严重性头痛<br>(n = 10,082) |
|-------------------------------------|---------------------|-----------------------|------------------------|------------------------|
| 年龄, 岁, 平均值 (标准差)                    | 59 (5.4)            | 58 (5.5)              | 59 (5.5)               | 60 (5.7)               |
| 非美, n (%)                           | 80 (19)             | 129 (13)              | 209 (16)               | 2,543 (25)             |
| 女, n (%)                            | 347 (82)            | 758 (76)              | 821 (64)               | 5,188 (52)             |
| 收缩压, mmHg, 平均值 (标准差)                | 124 (20)            | 121 (18)              | 124 (18)               | 125 (19)               |
| 舒张压, mmHg, 平均值 (标准差)                | 71 (11)             | 71 (10)               | 73 (10)                | 72 (11)                |
| 降压治疗, n (%)                         | 185 (44)            | 347 (35)              | 417 (33)               | 3,893 (38)             |
| 糖尿病, n (%)                          | 57 (14)             | 112 (11)              | 166 (13)               | 1,625 (17)             |
| 总胆固醇, mg/dL, 平均值 (标准差)              | 213 (41)            | 211 (38)              | 207 (38)               | 207 (37)               |
| 体质指数, kg/m <sup>2</sup> , 平均值 (标准差) | 29 (6.6)            | 28 (5.6)              | 28 (5.3)               | 29 (5.6)               |
| 冠心病史, n (%)                         | 26 (6.4)            | 43 (4.4)              | 58 (5.6)               | 763 (7.7)              |
| 卒中史, n (%)                          | 17 (4.0)            | 12 (1.2)              | 31 (2.4)               | 186 (1.2)              |
| 当前吸烟者, n (%)                        | 70 (17)             | 167 (17)              | 211 (16)               | 1,825 (18)             |
| 过去吸烟者, n (%)                        | 153 (36)            | 360 (36)              | 540 (42)               | 4,215 (42)             |
| 家庭总收入 < \$16000, n (%)              | 92 (22)             | 174 (17)              | 182 (14)               | 1,916 (19)             |
| 毕业的学院或职业学校, n (%)                   | 135 (32)            | 357 (36)              | 518 (41)               | 3,834 (38)             |
| 当前饮酒者, n (%)                        | 181 (43)            | 525 (52)              | 683 (53)               | 5,268 (52)             |
| 过去饮酒者, n (%)                        | 116 (27)            | 224 (22)              | 279 (22)               | 2,326 (23)             |
| APOEε4 携带者, n (%)                   | 126 (31)            | 290 (30)              | 351 (29)               | 2,971 (31)             |

缩写: ARIC = 社区粥样硬化危险因素研究; CHD = 冠心病; DBP = 舒张压; SBP = 收缩压

我们的分析结果。协变量的选择主要基于已知的白质疾病的危险因素。将  $p = 0.05$  定义为有统计学差异。

**标准方案的批准、注册和患者知情同意。** 研究方案得到各参与机构的机构审查委员会批准, 所有参与者签署知情同意书。

**结果** 根据第三次访视时头痛状态, 在表 1 中展示了临床基线和人口学资料。此队列的平均年龄为 60 岁, 23% 是非洲裔美国人, 56% 是女性。在所有研究对象中, 3.3% 为先兆偏头痛, 7.8% 无先兆, 10% 为非偏头痛的头痛, 79% 无严重头痛。在脑 MRI 的亚组中, 3.2% 为先兆偏头痛, 5.8% 为无先兆偏头痛, 8.5% 为非偏头痛的头痛, 83% 无严重的头痛。头痛者的头痛史平均为 17 年, 其中 69% 人过去一年无头痛。

在所有白质分析中, 头痛和性别的交互分析无意义; 因此, 我们展示了男性和女性的汇总结果。在第三次访视时, 校正潜在的混杂因素后, 与无头痛者相比, 任何头痛、偏头痛或非偏头痛的头痛者 WMH 评分  $\geq 3$  分的风险无统计学差异(图 2)。

根据有无视觉先兆对偏头痛者进行亚组分类时, 无先兆偏头痛者出现严重白质病变的风险显

著增加 [ 比值比 (odds ratio,OR) = 1.87; 95% 可信区间 (confidence interval,CI) : 1.04~3.37 ], 而无先兆偏头痛者则未增加相关风险 (OR = 0.55, 95%CI: 0.17~1.83)。然而, 当先兆偏头痛者和无先兆偏头痛者在一个独立模型中直接比较时, 此差异无统计学意义 (OR = 0.53,95%CI: 0.27~1.01)。在随访的脑 MRI 分析时, 偏头痛者比无头痛者的白质高信号体积平均大 2.65cm<sup>3</sup> (95%CI: 0.06~5.24), 但是非偏头痛的头痛和白质高信号体积更大间无关联 (-0.77cm<sup>3</sup>; 95%CI:-3.54~2.1) (表 2)。当偏头痛和非偏头痛的头痛直接比较时, 此差异无统计学意义 (2.79cm<sup>3</sup>; 95%CI: -0.75~6.33)。两次访视间, 在部分矫正模型中, 与参照组比较, 偏头痛者和白质高信号进展速率明显增加相关, 但是在完全矫正模型中, 则无此相关性。无论有无先兆, 偏头痛和白质高信号容积更大或白质高信号进展分别相关。包括所有种族分组的结果展示在表 e1 和 e2 中。详见 *Neurology*<sup>®</sup> 的网站 [www.neurology.org](http://www.neurology.org)。

**讨论** 本研究为基于人群的大样本队列研究, 结果显示, 偏头痛与脑白质高信号横向相关, 但是与脑白质病变随时间的进展无关联。

图2 第3次随访（1993-1995）时明确脑白质高信号得分 ≥ 3 的人群的不同头痛的校正后 OR 值

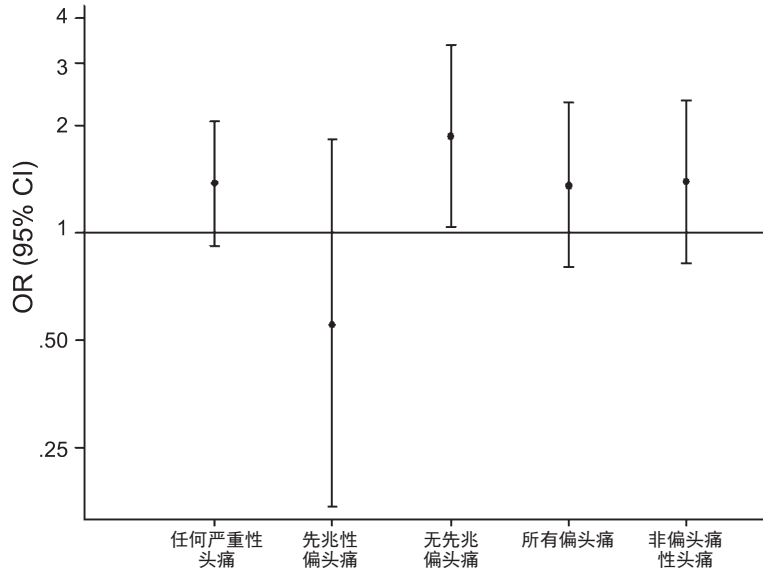

“无严重头痛”作为对照组，任何类型头痛亚组与之相对比。圆点表示风险比（OR），线条表示 95% 可信区间（CI）

本研究结果与以往研究结果一致，均显示在普通人群中偏头痛与脑白质高信号横向相关<sup>[1,2]</sup>。虽然具有统计学意义，但两者相关性较小，同时对临床相关结果有不同影响的其他因素如认知功能尚不清楚，但影响可能很小。第三次访视研究结果显示，先兆偏头痛与脑白质高信号无明显相关性，然而无先兆偏头痛与脑白质高信号具有相关性。这种差异可能是出于偶然，因为效应值差异无统计意义，并且在分析脑 MRI 随访数据时，两个亚型与脑白质高信号增加的相关性相似。此外，问卷调查中关于先兆仅用了一个问题，难于鉴别偏头痛两种亚型，造成此结果难以解释。

本研究结果显示，偏头痛与脑白质高信号进展无关，这与最近一项随访 9 年的 CAMERA 研究

（偏头痛患者脑异常信号研究，一项流行病学危险因素分析）结果相反，此研究发现女性中偏头痛与脑白质高信号的进展相关<sup>[4]</sup>。在 CAMERA 研究第一次随访时，对照组成员头颅 MRI 未发现脑白质高信号，同时说明 CAMERA 研究比 ARIC 研究参与人员更年轻、更健康，头痛发作次数更多。综上所述，上述研究说明偏头痛患者脑白质高信号改变发生在年龄早期，然而此改变因心血管危险因素患病率增加而淡化。药物对于脑白质高信号的作用仍不明确，但是如果治疗头痛，尤其是预防性治疗，可以考虑作为脑 WMH 的疾病修饰治疗方法，一些研究已经推荐了这些方法<sup>[11]</sup>，因此早期治疗可能对于脑白质疾病有更大的益处。然而，偏头痛预防性药物对于脑白质高信号的作

表2 头痛人群与无严重头痛人群在脑磁共振检测到的白质高信号体积 (cm<sup>3</sup>)、两次磁共振检查之间白质高信号体积的进展方面的校正<sup>a</sup>后差异

|         | 脑磁共振显示的白质高信号体积差异 (95% 置信区间) |                     | 两次脑磁共振检查之间白质高信号进展情况差异 (95% 置信区间) |                     |
|---------|-----------------------------|---------------------|----------------------------------|---------------------|
|         | 人口学因素校正后                    | 所有混杂均校正后            | 人口学因素校正后                         | 所有混杂均校正后            |
| 任何严重性头痛 | 1.42 (-0.53, 3.36)          | 1.12 (-0.89, 3.13)  | 0.84 (-0.66, 2.33)               | 0.72 (-0.78, 2.20)  |
| 先兆性偏头痛  | 2.32 (-1.84, 6.49)          | 2.58 (-1.67, 6.83)  | 2.09 (-0.99, 5.16)               | 2.50 (-0.70, 5.70)  |
| 无先兆偏头痛  | 3.25 (0.20, 6.30)           | 2.72 (-0.40, 5.82)  | 1.86 (-0.39, 4.11)               | 1.13 (-1.20, 3.46)  |
| 所有偏头痛   | 2.93 (0.39, 5.47)           | 2.65 (0.06, 5.24)   | 1.93 (0.05, 3.80)                | 1.58 (-0.37, 3.53)  |
| 非偏头痛性头痛 | -0.29 (-2.96, 2.39)         | -0.72 (-3.54, 2.10) | -0.07 (-2.05, 1.91)              | -0.29 (-2.37, 1.80) |

缩写：CI = 置信区间；WMH = 白质高信号。

<sup>a</sup> 人口学因素校正模型对年龄、种族或研究中心、性别因素进行校正。完全校正模型对年龄、种族或研究中心、性别、糖尿病、总胆固醇、血压、降压治疗、吸烟、冠心病史、体质指数、饮酒、家庭收入因素进行校正。

用较混杂,因为这些药物具有多面性。例如,β受体阻滞剂与钙离子拮抗剂常用于偏头痛预防治疗中,同时也有降压作用,这些药物可降低脑白质高信号进展<sup>[12]</sup>。

然而,偏头痛不影响脑白质高信号进展这一结论有待进一步验证。第一,脑白质高信号进展使用两个变量值计算,且每个变量均有一定的不确定性。第二,在第三次访视时的研究中WMH体积是由分类测量的方法间接计算出的,这种方法很容易出现测量误差。值得一提的是,对于偏头痛、先兆偏头痛和无先兆偏头痛的诊断较积极,且样本量较大,所以更易得到阳性结果。第三,由于本研究两次随访问隔时间较短,并且第二次行头颅磁共振时,参与者年龄较小,造成脑白质高信号进展不明显。如果将研究时间延长,参与者脑白质高信号进展更明显,可能会得到统计学差异。总之,我们也有可能犯了II类错误而得到了假阴性结果。

此研究的优势为基于人群的大样本队列研究,并且有标准化的头痛诊断以及脑白质的测量。然而,仍存在一些局限性。第一,尽管在第三次访视时研究中样本量很大,但是行头颅MRI的样本量不大,使我们较难得到脑白质病变进展的统计学差异。本研究未将WMH分为侧脑室旁WMH及深部WMH。许多研究表明偏头痛与总WMH相关,尤其是深部脑白质高信号。如果我们将WMH进一步分为侧脑室旁或深WMH,WMH的进展可能会更精确。此外,对于头痛的诊断为回顾性(提问参与人员,是否有头痛病史),并未完全遵照ICHD-2诊断标准。随着年龄的增长,偏头痛患者尤其是女性患者头痛发作的频率减少、严重程度降低<sup>[13]</sup>,就会出现头痛组患者在之前有头痛发作而在研究期间无头痛发作。因此,我们并不能得出偏头痛发作与脑白质疾病之间存在特定的关联。第二,本研究较其他研究偏头痛的患病率较低<sup>[14]</sup>,可能是因为一些偏头痛患者遗忘其头痛病史而被误分入无严重头痛组。总体来说,有较重脑白质疾病患者认知功能受损后,无法回忆起头痛病史,造成偏头痛患者误纳入无头痛组将会使结果偏向阴性。相反,如果有较重白质病变患者经历较频繁和严重头痛并且较易回忆出头痛病史,结果将倾向于阳性结果。

我们也选择无严重头痛病史的人群作为初始

参照组。虽然我们认为大多数偏头痛患者头痛持续时间至少4个小时,但我们可能错过了一些持续时间小于4个小时的偏头痛患者,尤其是治疗后。如果这样的话,考虑到一部分发病时间短的偏头痛患者被纳入无头痛组,这将会减弱真实的效应值,因此可能会低估偏头痛与脑WMH的相关性。同时,由于有先兆而无头痛发作(少见但有报道)的患者实际上应归类于偏头痛,但本研究归类于非偏头痛组,也会因为同样的原因减弱真实效应值。还有一种可能但少见的情况,无偏头痛组人群也可在两次随访期间新患偏头痛,从而导致误分。此外,我们缺少头痛的发病年龄。本研究将儿童时期头痛与成年时头痛视为等同,但是两个时期头痛对人的危害不同。最后,我们不能完全控制药物应用,尤其是治疗偏头痛的药物。因此偏头痛与脑WMH进展之间的联系以及其产生的机制还需要进一步研究。

## 作者贡献

Ali G. Hamedani conceived of the study, analyzed data, and wrote the manuscript. Kathryn M. Rose and B. Lee Peterlin provided input during study inception, consulted on migraine data, and critically reviewed the manuscript. Thomas H. Mosley, Laura H. Coker, Clifford R. Jack, David S. Knopman, and Alvaro Alonso critically reviewed the manuscript. Rebecca F. Gottesman provided input during study inception, provided input on data analysis, and critically reviewed the manuscript.

## 致谢

The authors thank the staff and participants of the ARIC study for their important contributions.

## 研究基金

Supported by NHLBI contracts N01-HC-55015, N01-HC-55016, N01-HC-55018, N01-HC-55019, N01-HC-55020, N01-HC-55021, and N01-HC-55022. The Atherosclerosis Risk in Communities Study is conducted as a collaborative study supported by National Heart, Lung, and Blood Institute contracts (HHSN268201100005C, HHSN268201100006C, HHSN268201100007C, HHSN268201100008C, HHSN268201100009C, HHSN268201100010C, HHSN268201100011C, and HHSN268201100012C). Neurocognitive data collection is supported by U01 HL096812, HL096814, HL096899, HL096902, and HL096917 with previous brain MRI examinations funded by R01-HL70825.

## 声明

A. Hamedani: Dr. Hamedani's parents are employees of GlaxoSmithKline. Dr. Hamedani was funded by the Johns Hopkins Predoctoral Clinical Research Training Program (NIH TL1 training grant) and completed this work as part of a master's thesis in epidemiology. K. Rose: In 2001, Dr. Rose was a paid consultant for GlaxoSmithKline. These funds did not support the research presented in this report. B. Lee Peterlin: Dr. Peterlin is supported by a mentored patient-oriented career research award (K23 10896737) from the National Institute of Neurological Disorders and Stroke and receives grant support from GlaxoSmithKline and Luitpold Pharmaceuticals for investigator-initiated study proposals unrelated to the current study. She is also an associate editor for the journal *Headache*. T. Mosley, L. Coker, and C. Jack report no disclosures. D. Knopman: Dr. Knopman serves as deputy editor for *Neurology*<sup>®</sup>; served on a Data Safety Monitoring Board for Lilly Pharmaceuticals, performed

consulting activities for TauRx Pharmaceuticals, and receives research support from the NIH. A. Alonso reports no disclosures. R. Gottesman: Dr. Gottesman is funded by the NIH (NIA) with an R01 grant on an unrelated topic. She is on the *Neurology*<sup>®</sup> editorial board. Go to [Neurology.org](http://Neurology.org) for full disclosures.

Received November 16, 2012. Accepted in final form July 9, 2013.

### 参考文献

1. Kruit MC, van Buchem MA, Hofman PA, et al. Migraine as a risk factor for subclinical brain lesions. *JAMA* 2004;291:427–434.
2. Kurth T, Mohamed S, Maillard P, et al. Headache, migraine, and structural brain lesions and function: population based epidemiology of vascular ageing-MRI study. *BMJ* 2011;342:c7357.
3. Longstreth WT Jr, Manolio TA, Arnold A, et al. Clinical correlates of white matter findings on cranial magnetic resonance imaging of 3301 elderly people: the Cardiovascular Health Study. *Stroke* 1996;27:1274–1282.
4. Palm-Meinders IH, Koppen H, Terwindt GM, et al. Structural brain changes in migraine. *JAMA* 2012;308:1889–1897.
5. The ARIC Investigators. The Atherosclerosis Risk in Communities (ARIC) Study: design and objectives. *Am J Epidemiol* 1989;129:687–702.
6. Mosley TH Jr, Knopman DS, Catellier DJ, et al. Cerebral MRI findings and cognitive functioning: the Atherosclerosis Risk in Communities Study. *Neurology* 2005;64:2056–2062.
7. Liao D, Cooper L, Cai J, et al. Presence and severity of cerebral white matter lesions and hypertension, its treatment, and its control. The ARIC Study. Atherosclerosis Risk in Communities Study. *Stroke* 1996;27:2262–2270.
8. Manolio TA, Kronmal RA, Burke GL, et al. Magnetic resonance abnormalities and cardiovascular disease in older adults. The Cardiovascular Health Study. *Stroke* 1994;25:318–327.
9. Jack CR Jr, O'Brien PC, Retzlman DW, et al. FLAIR histogram segmentation for measurement of leukoaraiosis volume. *J Magn Reson Imaging* 2001;14:668–676.
10. Gottesman RF, Coresh J, Catellier DJ, et al. Blood pressure and white-matter disease progression in a biethnic cohort: Atherosclerosis Risk in Communities (ARIC) Study. *Stroke* 2010;41:3–8.
11. Loder E, Biondi D. Disease modification in migraine: a concept that has come of age? *Headache* 2003;43:135–143.
12. Dufouil C, Chalmers J, Coskun O, et al. Effects of blood pressure lowering on cerebral white matter hyperintensities in patients with stroke: the PROGRESS (Perindopril Protection Against Recurrent Stroke Study) Magnetic Resonance Imaging Substudy. *Circulation* 2005;112:1644–1650.
13. Lyngberg AC, Rasmussen BK, Jorgensen T, Jensen R. Prognosis of migraine and tension-type headache: a population-based follow-up study. *Neurology* 2005;65:580–585.
14. Stewart WF, Wood C, Reed ML, Roy J, Lipton RB; AMPP Advisory Group. Cumulative lifetime migraine incidence in women and men. *Cephalalgia* 2008;28:1170–1178.

(许予明 翻译& 审校)
